# Supplementary material for: Microwave- and Ultrasound-Assisted Extraction of Cucurbitane-Type Triterpenoids from Momordica charantia L. Cultivars and Their Antiproliferative Effect on SAS Human Oral Cancer Cells
Source: MDPI journal article supplement (doi:10.3390/foods11050729), 2022-03-01
Supplement: s1 [file s1]

Supplementary material

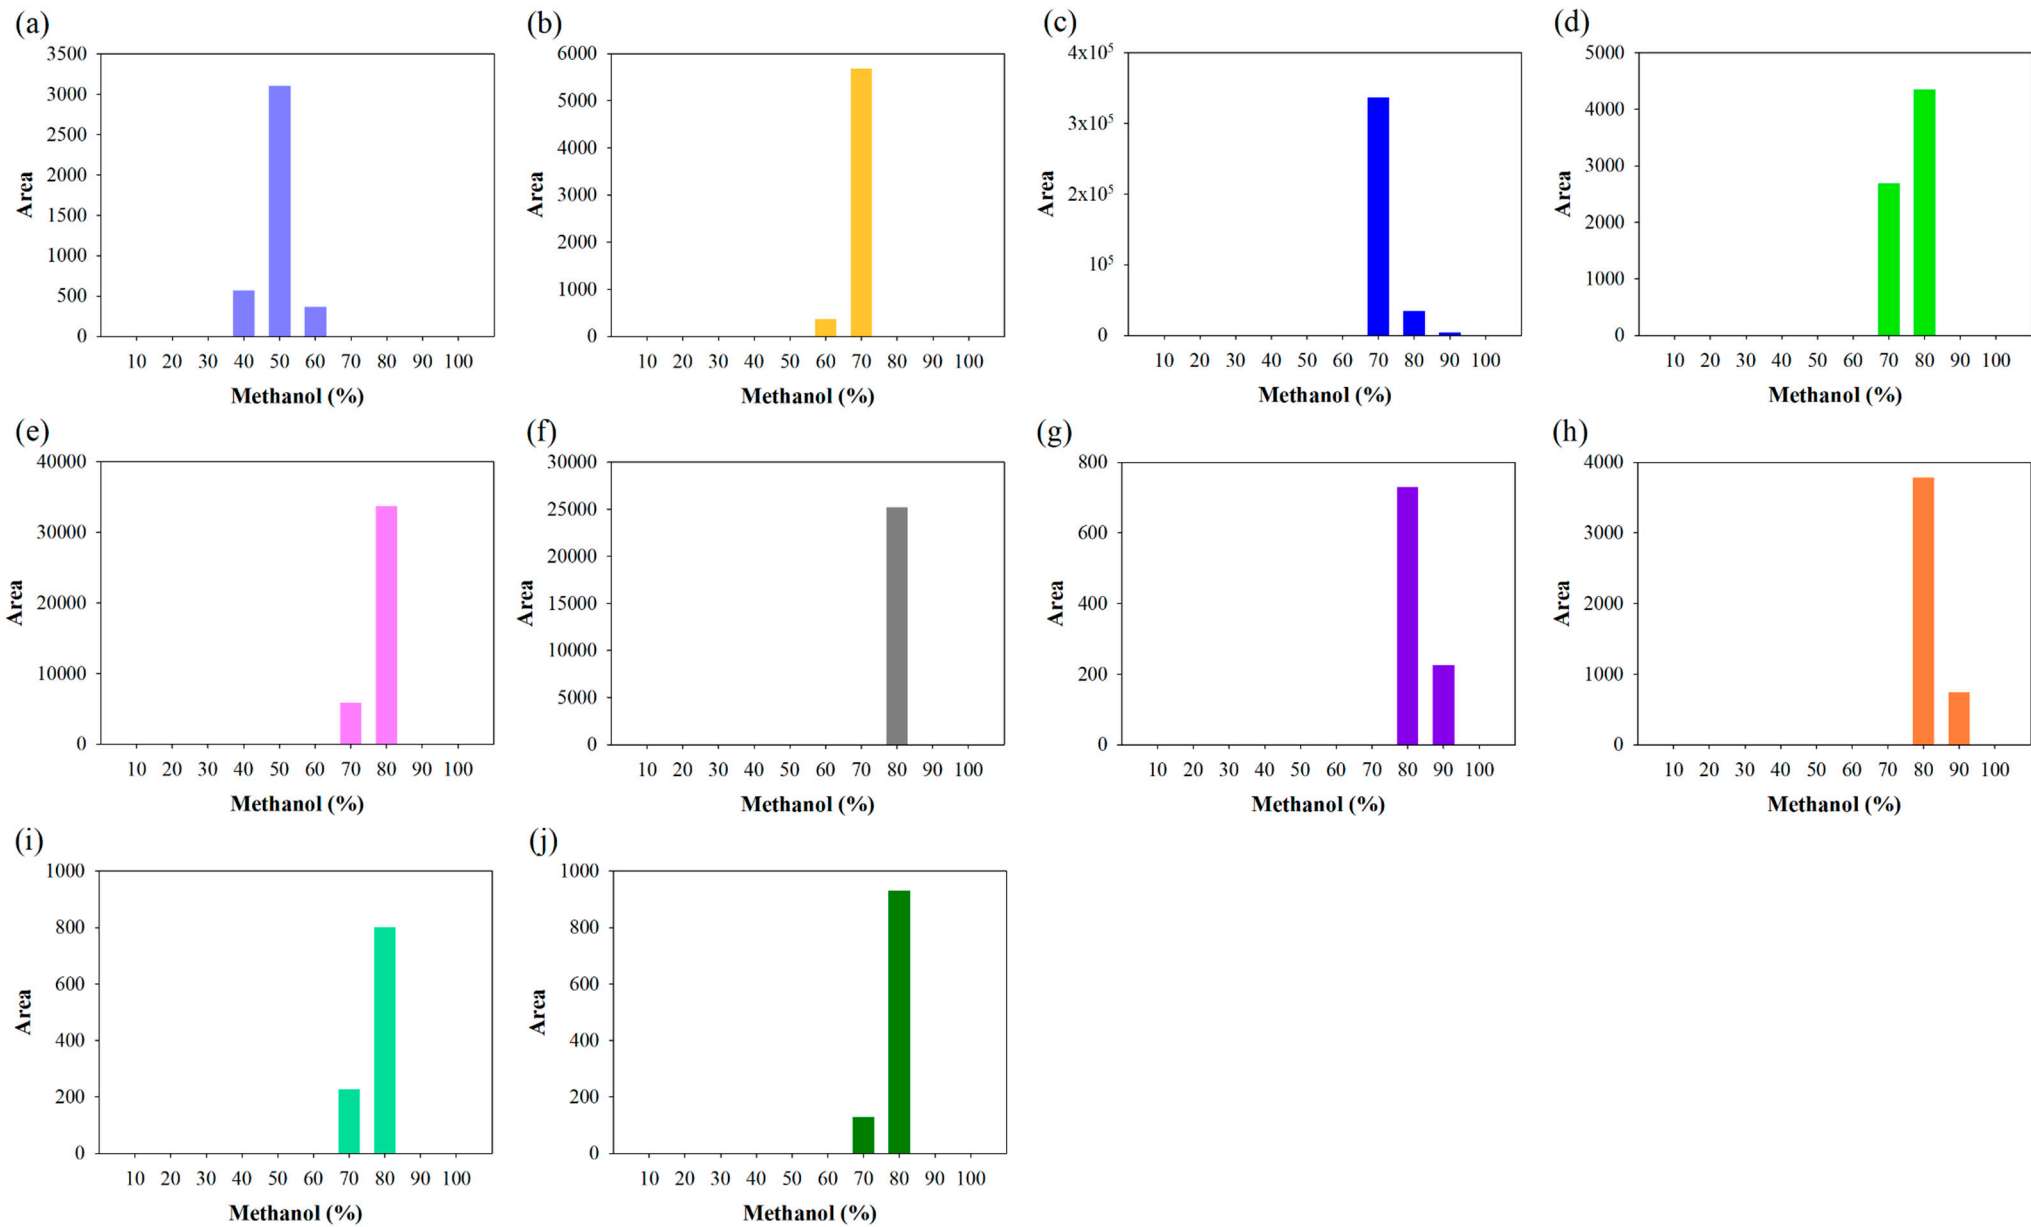

**Figure S1.** Solid phase extraction process of (a) Momordicoside A; (b) Momordicoside L; (c) 3 $\beta$ ,7 $\beta$ ,25-trihydroxycucurbita-5,23(E)-dien-19-al; (d) Momordicoside K; (e) Momordicine I; (f) Momordicoside I aglycone; (g) Momordicoside G; (h) Momordicoside F<sub>1</sub>; (i) Momordicoside I; (j) Momordicoside F<sub>2</sub>.

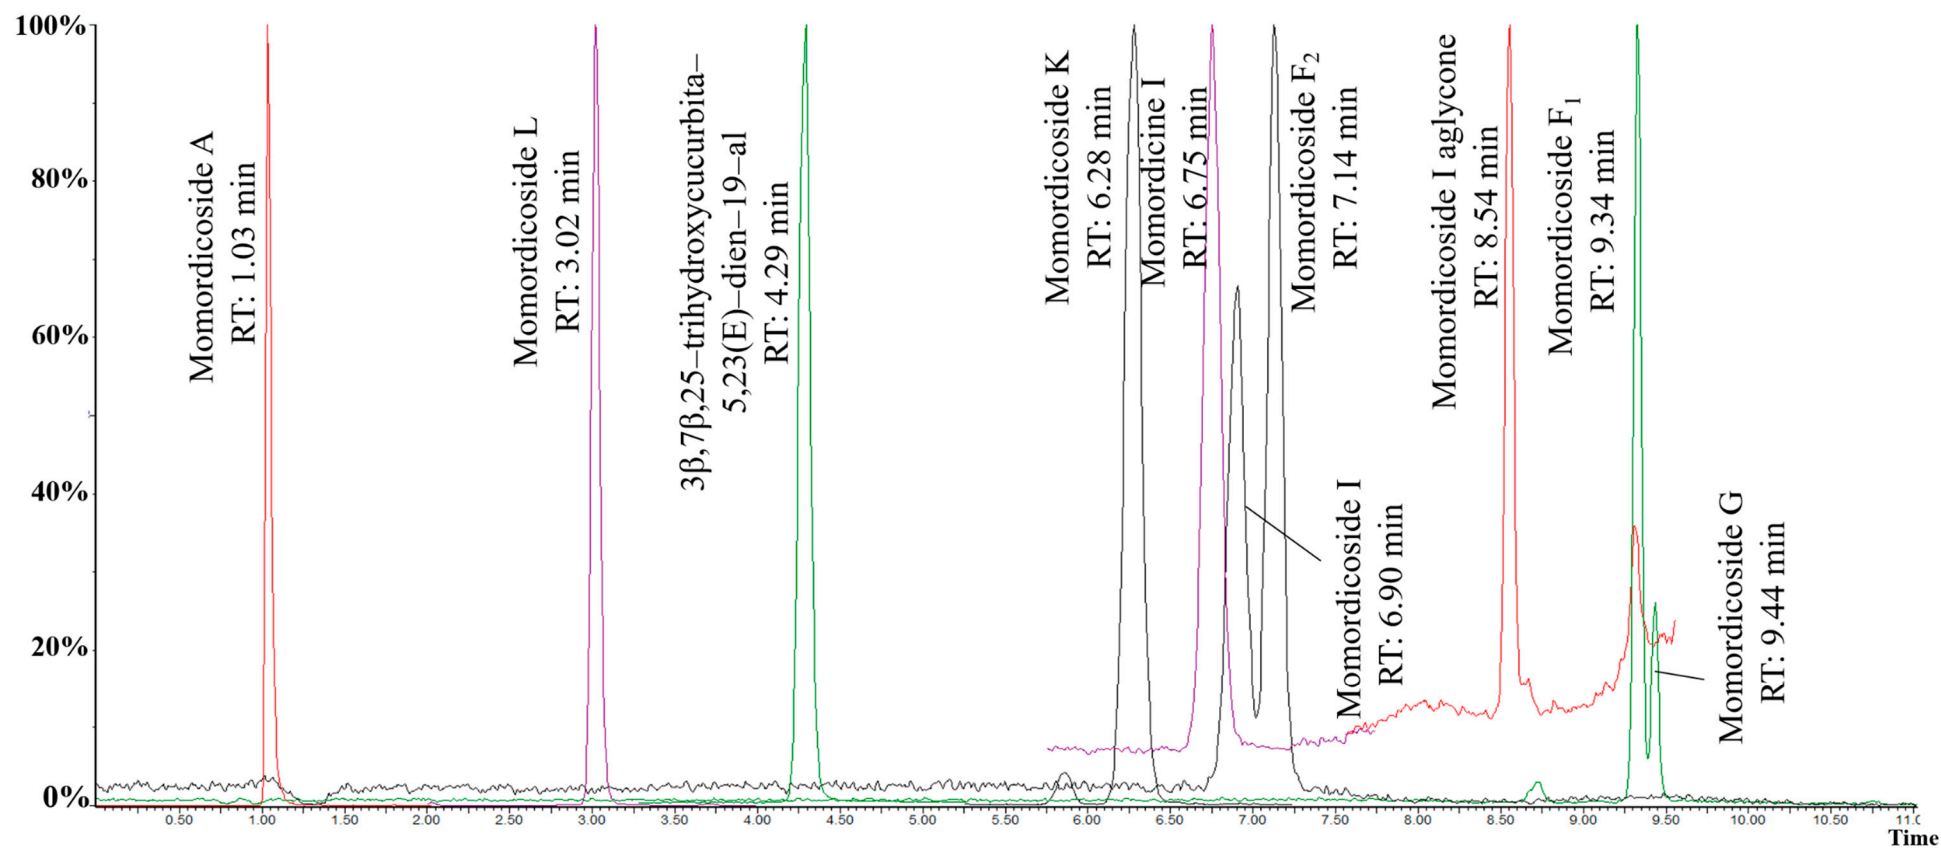

**Figure S2.** LC–MS/MS chromatogram of ten cucurbitane-type triterpenoids 100 ppb mix standard.
